# Supplementary material for: CRTC3, a sensor and key regulator for melanogenesis, as a tunable therapeutic target for pigmentary disorders
Source: PubMed Central journal article supplement (PMC8581419; doi:10.7150/thno.66378), 2021-10-17
Supplement: thnov11p9918s1.pdf [file thnov11p9918s1.pdf]

# 1 Supplementary materials

2

3 **Supplementary Table 1.** List of primers used for qRT-PCR (F: Forward, R: Reverse)

| Name     | Forward (3' → 5')          | Reverse (5' → 3')       |
|----------|----------------------------|-------------------------|
| mL32     | TCTGGTGAAGCCCAAGATCG       | CCTCTGGGTTTCCGCCAGTT    |
| mCRTC3   | GAAGTTCAGTGAGAAGATCGC      | CCCCGTGGTACTGGGTAAG     |
| mNR4A2   | AGTCTGATCAGTGCCCTCGT       | GATCTCCATAGAGCCGGTCA    |
| mCREB    | CCAGTCTCCACAAGTCCAAACA     | GGCACTGTTAGAGTGGTGGTATG |
| mERK1    | CCTGCTGGACCGGATGTTA        | TGAGCCAGCCTTCCTCTAC     |
| mERK2    | GGAGCAGTATTATGACCCAAGTGA   | TCGTCCACTCCATGTCAAACCT  |
| mMLANA   | GACGAAGTGGATACAGAACCTTG    | CTCTTGAGAAGACAGTCGGCTG  |
| mMITF-M  | GGGATGCCTTGTTTATGGTG       | CACCGCAGACCACTTAGTCC    |
| mTyrp1   | CCCCTAGCCTATATCTCCCT       | TACCATCGTGGGGATAATGG    |
| mDCT     | CTTTGCAACCGGGAAGAACG       | CCGACTAATCAGCGTTGGGT    |
| mTyr     | TTATGCGATGGAACACCTGA       | GAGCGGTATGAAAGGAACCA    |
| mPmel    | CAAGTTCCTGGACTGTGT         | GTGCTACCATGTGGCATTG     |
| mSOX10   | CGGACGATGACAAGTTCCCC       | GTGAGGGTACTGGTCGGCT     |
| mSLC24A5 | AGAGCACGGATGGAGGTATCGT     | GCAACATCCTGCGACAGTCCAA  |
| mSLC45A2 | ACACAGAGCAGCCAGTACAGGA     | CAATCAGGTGGCTGACGCAAAG  |
| mOCA2    | ATAGTGAGCAGGGAGGCTGT       | ACTGATGGGCCAGCAAAGA     |
| mSCF     | TCCGAAGAGGCCAGAACTA        | TCCCTTTCTCGGGACCTAAT    |
| mET1     | ACTTCTGCCACCTGGACATC       | GGTGAGCGCACTGACATCTA    |
| mBFGF    | AAGCGGCTCTACTGCAAGAACG     | CCTTGATAGACACAACCTCCTC  |
| mPOMC    | AAGTGGAGATTCAACACCATTCTTAA | GTCCAGAGCTGAGACACCCTTAC |
| hGAPDH   | CCATCTTCCAGGAG             | GTTGTCATGGATGACCTTGGC   |
| hCRTC3   | GCACCAGCCTGTTCAAAGAC       | TCTGCAGCTCCTCTTCCAGT    |
| hMITF-M  | TCTACCGTCTCTCACTGGATTGG    | GCTTTACCTGCTGCCGTTGG    |
| hTyrp1   | CCCCTAGCCTATATCTCCCTTTT    | TACCATCGTGGGGATAATGGC   |
| hDCT     | TGTGCAAGATTGCCTGTCTC       | GTTGCTCTGCGTTAGGAAG     |
| hTyr     | TCAGCACCCACAAATCCTAA       | AATCGGCTACAGACAATCTGC   |
| hPmel    | GAAGACCTGGGGGCAATACT       | TGAAGGCTGAGCTGGAATGA    |
| hSOX10   | ATGAACGCCTTCATGGTGTGGG     | CGCTTGTCCTTTCGTTTCAGCAG |
| hSLC24A5 | AGCGCAGAGATGGAGGCATCAT     | TGTGCCTGCAACATCCTGAGAC  |
| hSLC45A2 | CTTTGCATCAGCCACCTCATTGG    | TCCAACCTCGACTCCTCTTTTCG |

|       |                        |                         |
|-------|------------------------|-------------------------|
| hOCA2 | AGGAGAAGCGAGCACTCAGTGA | CACCTGGGTTTCTACACTCCG   |
| hSCF  | TGGTGGCAAATCTTCCAAAAAG | CAATGACTTGGCAAAACATCCA  |
| hET1  | AAGGCAACAGACGCTGAAAAT  | CGACCTGGTTTGTCTTAGGTG   |
| hBFGF | AGCGGCTGTACTGCAAAAACGG | CCTTTGATAGACACAACCTCCTC |
| hPOMC | CTGGAGAGCAGCCAGTGTCAG  | AGAGGCTGCTCGTCGCCATTTC  |

4

5

6

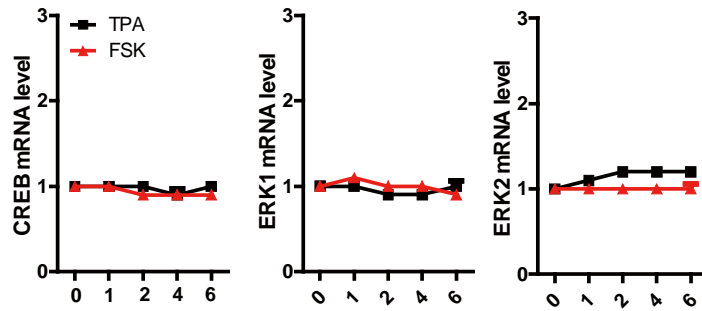

7

8 **Fig. S1.**

9 The mRNA levels of CREB, ERK1, and ERK2 in Mel-Ab cells treated with FSK or TPA.

10

11

12

13

14

15

16

17

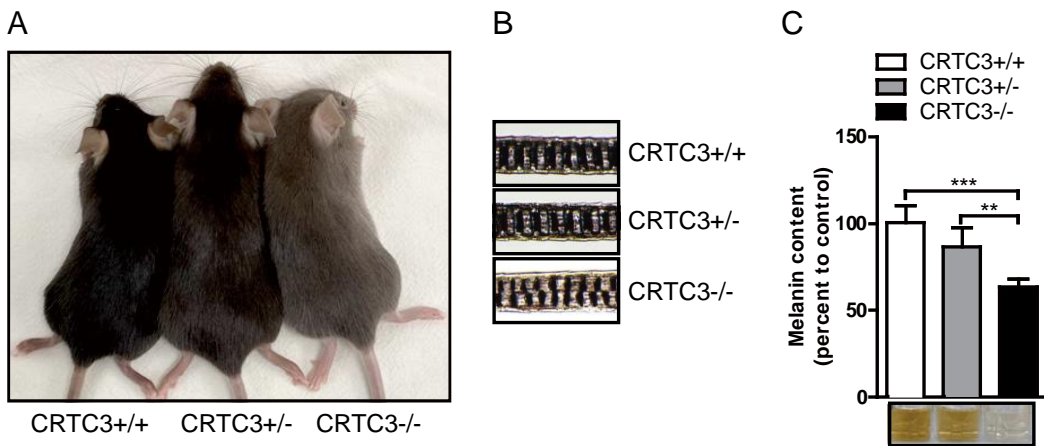

18

19 **Fig. S2.**

20 Lighter coat color and hypopigmentation of skin in CRTC3 null mice. (A) The comparison of  
21 hair color and (B) hair structure of CTRC3 wild type CTRL, CRTC3 heterozygotes and null  
22 mice (C) Quantification of melanin content of dorsal hair from CTRL, CRTC3 hetero and null  
23 mice (n = 3 per group, 2 month old).

24

25

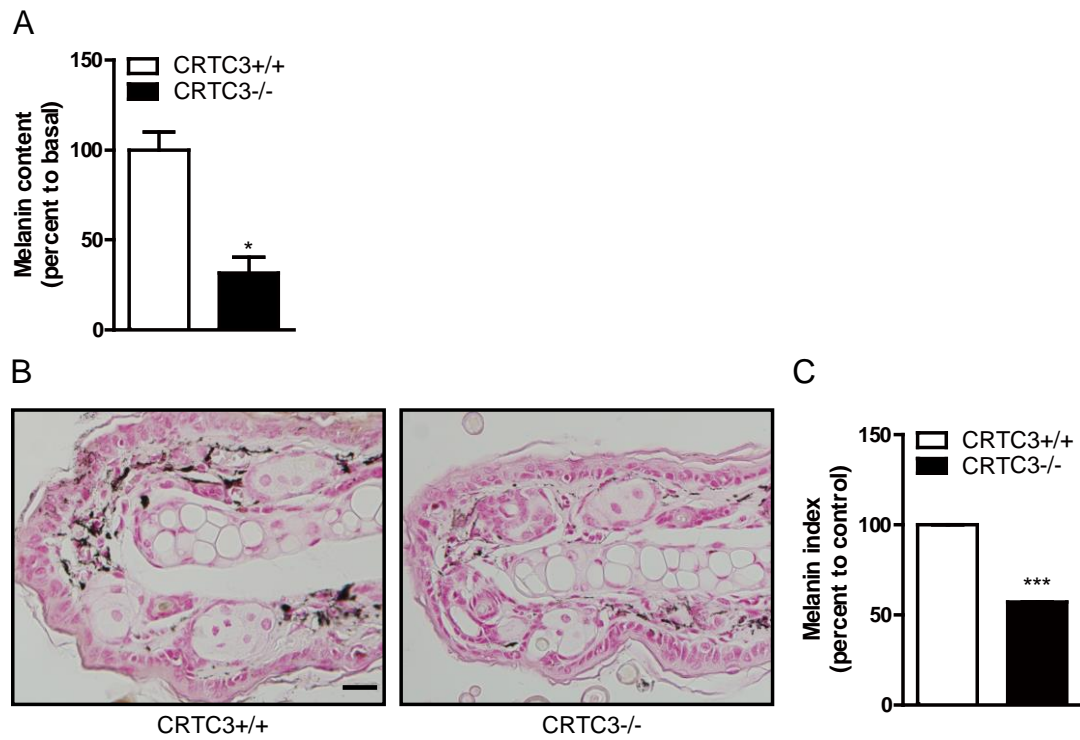

26

27 **Fig. S3.**

28 (A) Quantification of melanin content in tail skin from CTRL and CRTC3 null mice (B)  
 29 Histology of ear skin and (C) melanin index displayed as percent to control from CTRL and  
 30 CRTC3 null mice (Bar = 20  $\mu$ m).

31

32

33

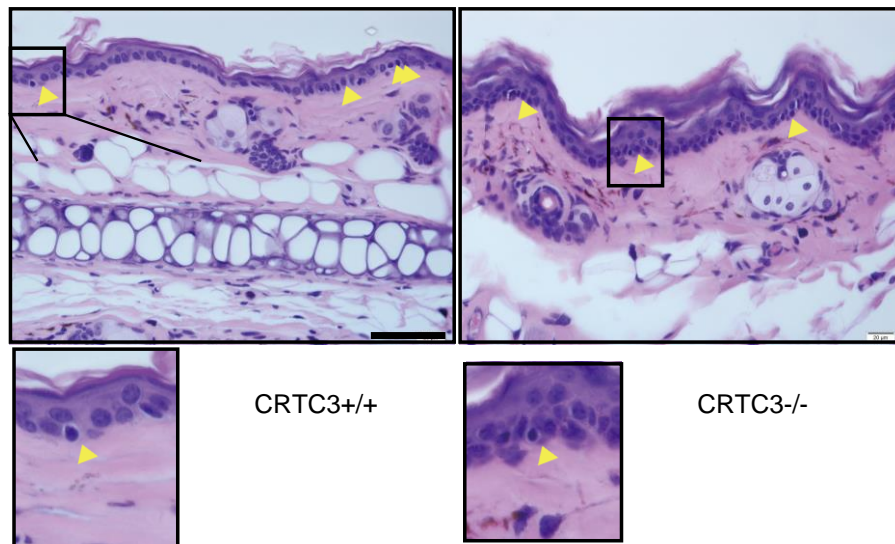

34

35 **Fig. S4.**

36 Comparison of epidermal melanocytes (yellow arrow) in ear skin of CTRL and CRTC3 null  
 37 mice (Bar = 50  $\mu$ m).

38

Fig. S5

A

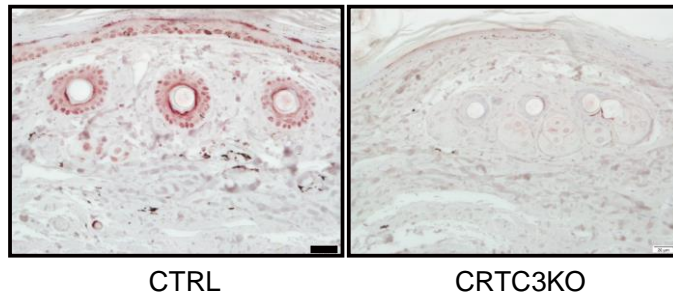

B

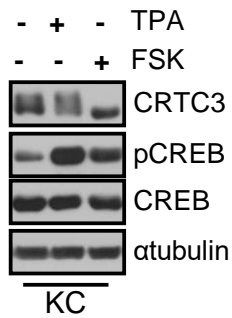

C

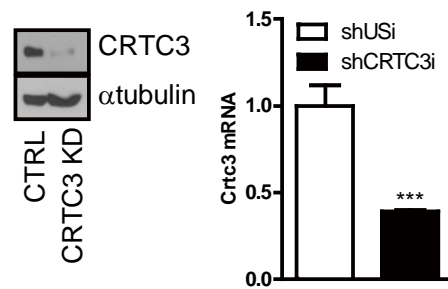

D

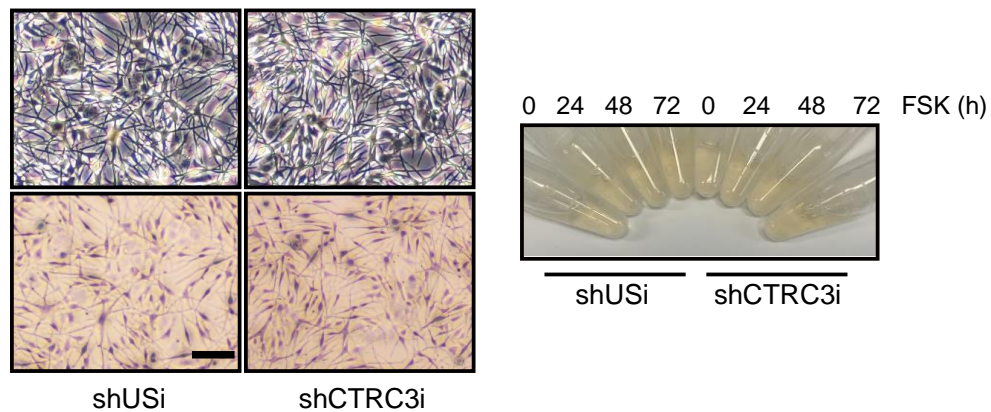

39

40 **Fig. S5.**

41 (A) Immunohistochemistry using CRTC3 antibodies in the tail skin of CTRL and CRTC3 null  
42 mice (Bar = 50  $\mu$ m). (B) Expression and response of CRTC3 and CREB to FSK and TPA  
43 stimulation in normal human keratinocytes. (C) Protein and mRNA levels of CRTC3 in  
44 control and CRTC3KD keratinocytes. (D) Microscopic images of normal human melanocytes  
45 (NHM) co-cultured with either control HaCaT keratinocytes or CRTC3KD keratinocytes after  
46 72 h with/without FSK treatment (left panel) and cell lysates showing melanin content (right  
47 panel) (Bar = 100  $\mu$ m).

48

49

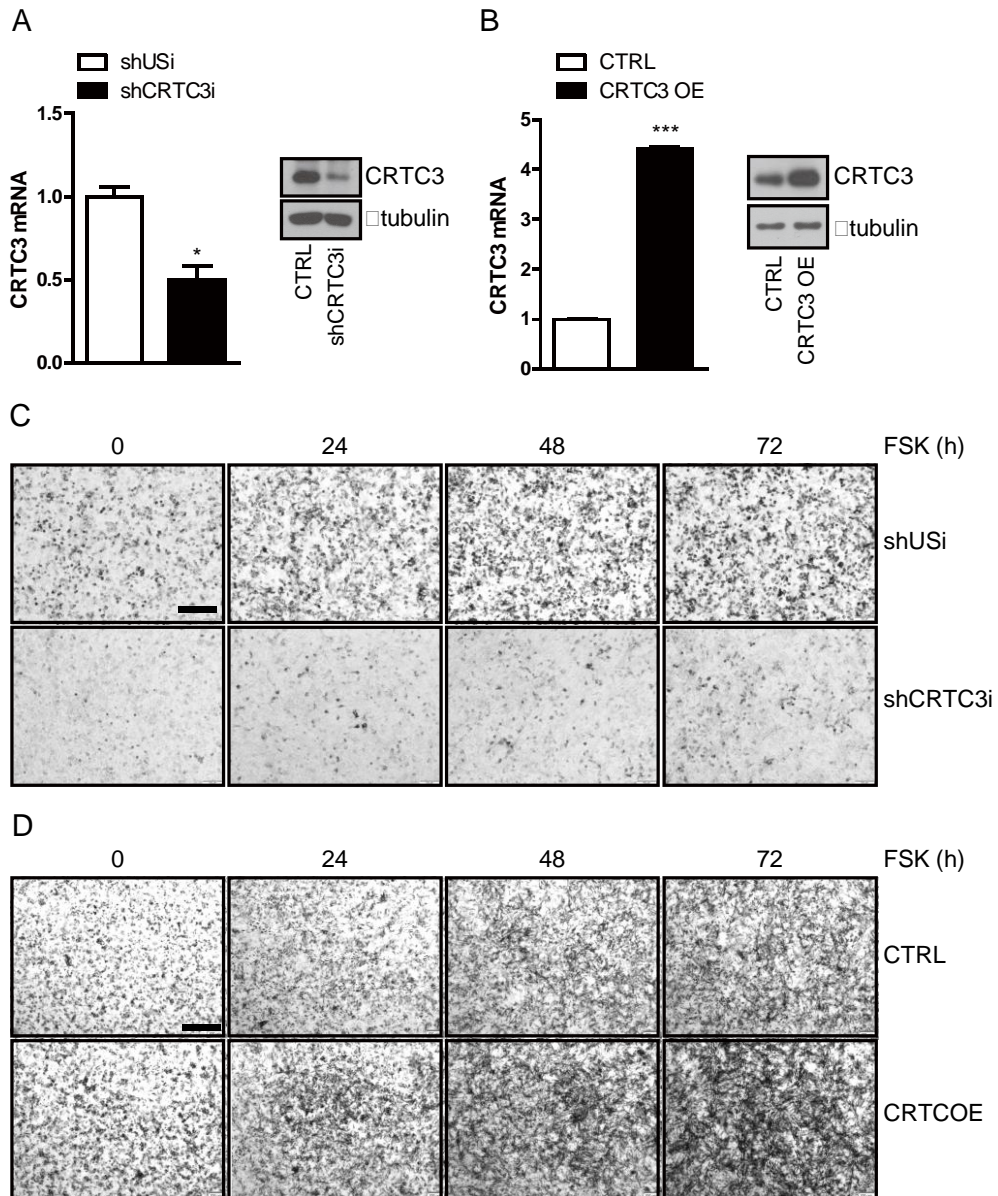

50

51 **Fig. S6.**

52 (A) mRNA and protein levels in control and CRTC3KD Mel-Ab cells. (B) mRNA and protein  
 53 levels in control and CRTC3 overexpressing (OE) Mel-Ab cells. Microscopic images of (C)  
 54 control and CRTC3KD Mel-Ab cells and (D) control and CRTC3OE Mel-Ab cells at 0, 24,  
 55 48, 72 h after FSK treatment (Bar = 500  $\mu$ m).

56

57

58

59

60

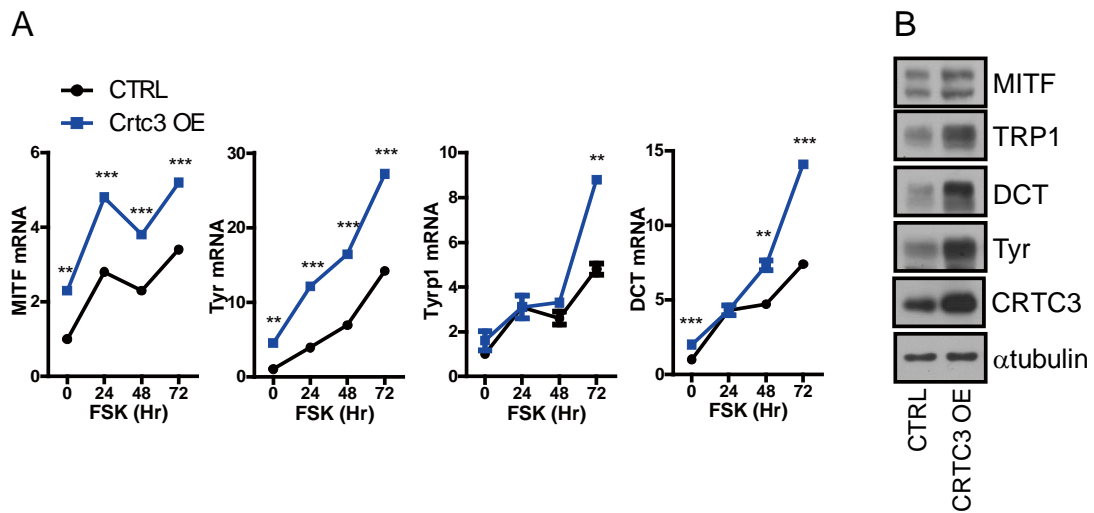

61

62 **Fig. S7.**

63 (A) mRNA and (B) protein levels in control and CRTC3 overexpressing (OE) Mel-Ab cells  
 64 at 0, 24, 48, 72 h after FSK treatment.

65

66

67

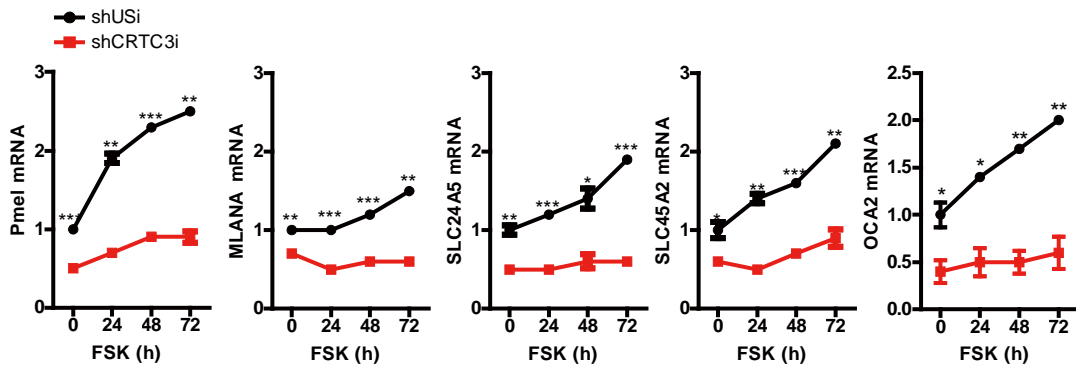

68

69 **Fig. S8.**

70 mRNA level of melanogenesis related genes in control and CRTC3KD Mel-Ab cells at 0, 24,  
 71 48, 72 h after FSK treatment.

72

73

74

75

76

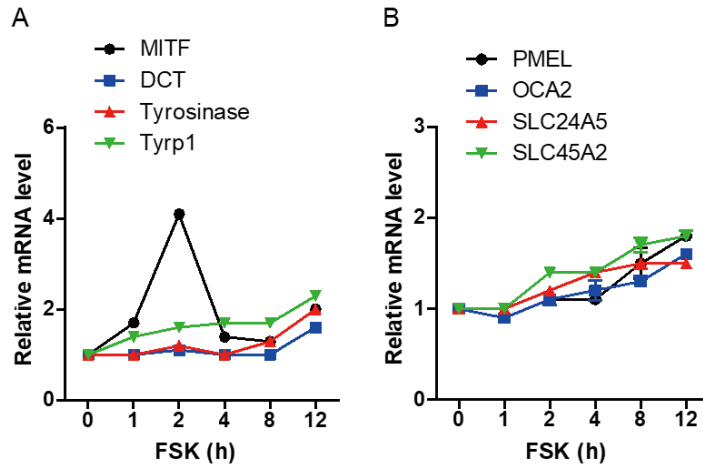

77

78 **Fig. S9.**

79 (A-B) mRNA level of melanogenesis-related genes in B16F10 melanoma cells within 12 h  
 80 after FSK treatment.

81

82

83

84

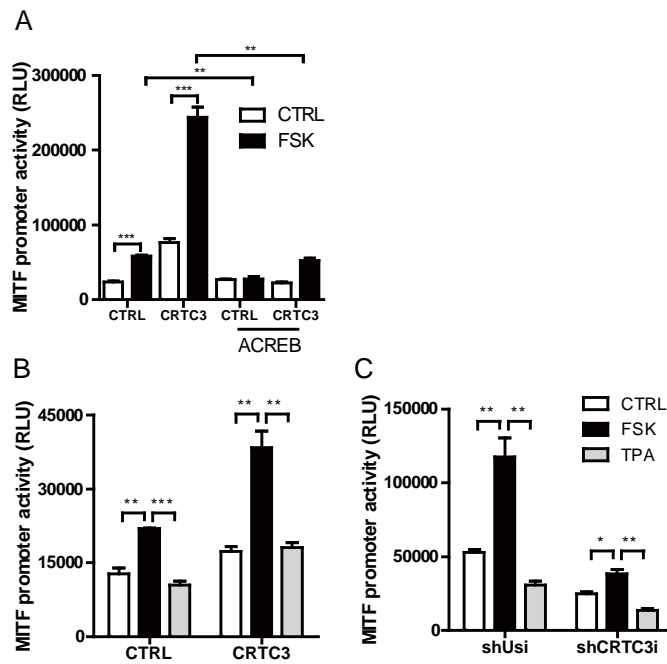

85

86 **Fig. S10.**

87 (A) MITF promoter activity by FSK treatment, CRTC3 and/or ACREB overexpression in  
 88 B16F10 melanoma cells. Comparison of MITF promoter (B) in control and CRTC3  
 89 overexpressing B16F10 melanoma cells and (C) in control and CRTC3KD B16F10 melanoma  
 90 cells.

91

92

93

94



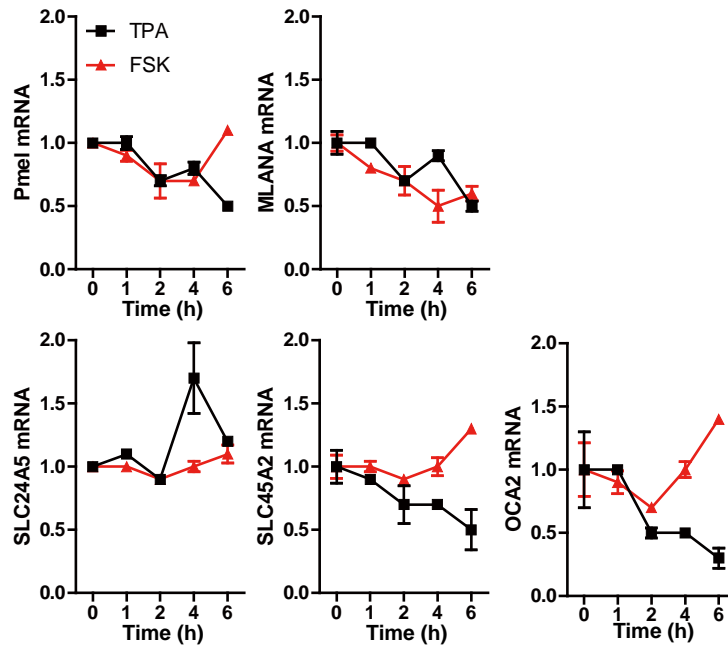

95

96 **Fig. S11.**

97 mRNA level of melanogenesis-related genes in Mel-Ab cells within 6 h after FSK or TPA  
 98 treatment.

99

100

101

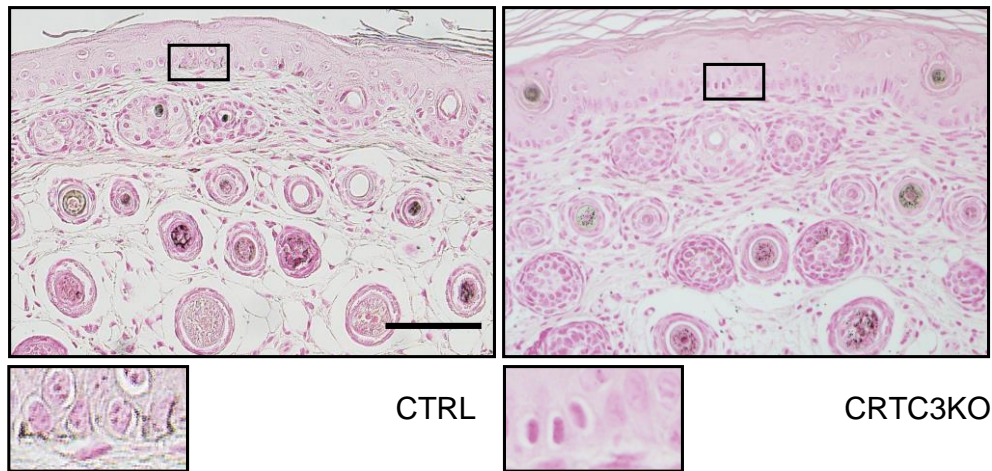

102

103 **Fig. S12.**

104 Microscopic images of Fontana-Masson stained tail skin sections from neonatal CTRL and  
 105 CRTC3 null mice (Bar = 50  $\mu$ m).

106

107

108

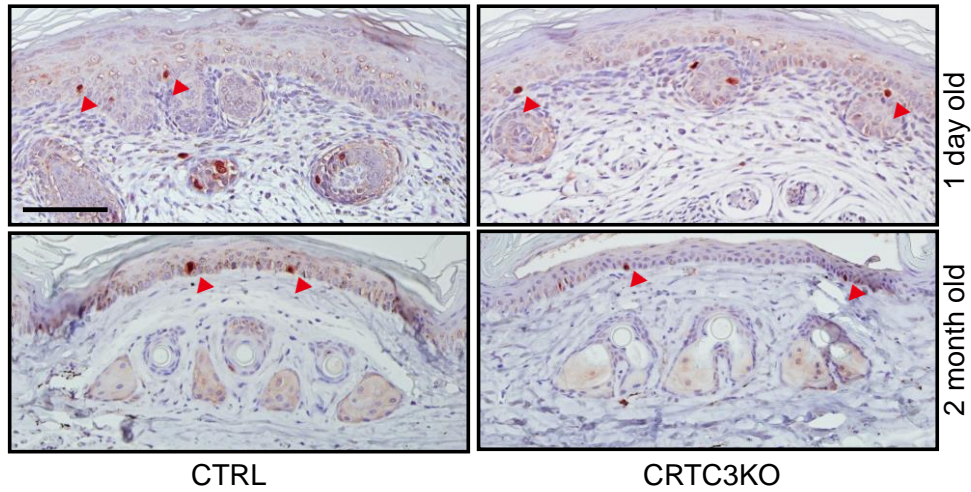

109

110 **Fig. S13.**

111 Immunohistochemistry using Ki67 antibody in the tail skin of neonatal CTRL and CRT3  
 112 null mice (Bar = 50  $\mu$ m).

113

114

115

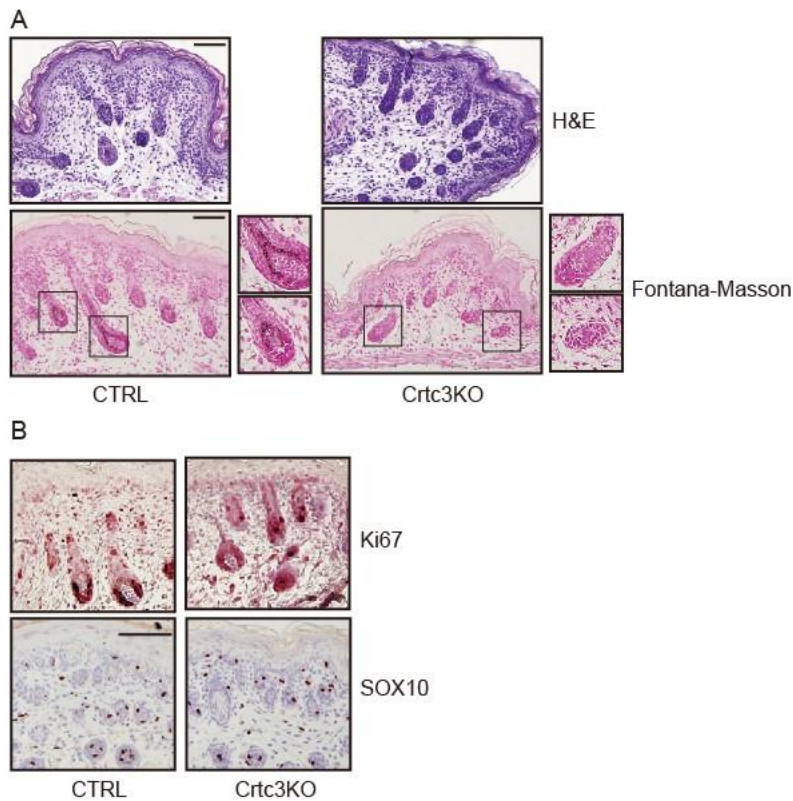

116

117 **Fig. S14.**

118 (A) H&E (upper panels) and Fontana-Masson (low panels) stained dorsal skin sections from  
 119 neonatal CTRL and CRT3 null mice (Bar = 50  $\mu$ m). (B) Immunohistochemistry using Ki67  
 120 (upper panels) and SOX10 (downer panels) antibodies in the dorsal skin of neonatal CTRL  
 121 and CRT3 null mice (Bar = 50  $\mu$ m).

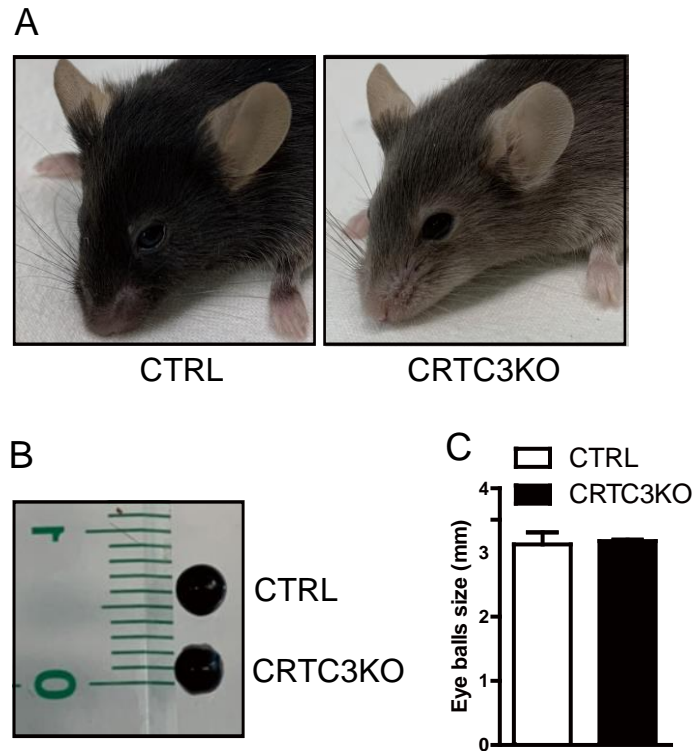

122

123 **Fig. S15.**

124 Closed-up pictures of (A) eyes and (B) dissected eyeballs of CTRL and CRTC3 null mice. (C)

125 eyeball size (n=3 for each group).

126

127

128

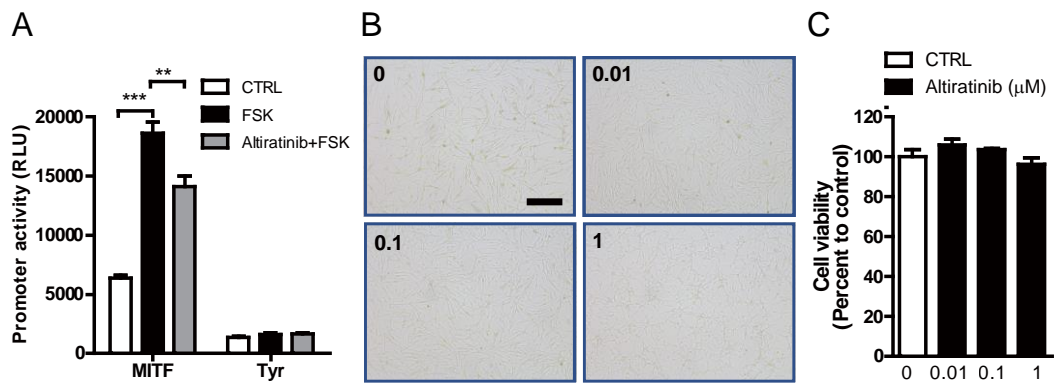

129

130

131 **Fig. S16.**

132 The effect of FSK and altiratinib on MITF and tyrosinase promoter activity. (B) Microscopic

133 images of primary human melanocytes at 72 h after 0, 0.01, 0.1, and 1 μM of altiratinib

134 treatment (Bar = 1000), (C) The effect of altiratinib (0.01-1 μM) on cell viability of HaCat

135 human keratinocytes cell line as assed by MTT assay.

136

137

138
